# Supplementary material for: The gene family-free median of three
Source: PubMed Central journal article supplement (PMC5446766; doi:10.1186/s13015-017-0106-z), 2017-05-26
Supplement: 13015_2017_106_MOESM1_ESM.pdf [file 13015_2017_106_MOESM1_ESM.pdf]

# Supporting Information

## for

## The gene family-free median of three

Daniel Doerr, Pedro Feijão, Metin Balaban, and Cedric Chauve

December 17, 2016

### 1 Hardness proof of Problem FF-Median

**Theorem 1.** *Problem FF-Median is MAX SNP-hard.*

**Reduction.** The *maximum independent set problem for graphs bounded by node degree 3*, denoted as MAX IS-3 is MAX SNP-hard [3]. The corresponding decision problem can be informally stated as follows: Given a graph  $\Lambda$  bounded by degree 3 and some number  $l \geq 1$ , does there exist a set of vertices  $V' \subseteq V$  of size  $|V'| = l$  whose induced subgraph is unconnected? In the following, we present a transformation scheme  $\mathbf{R}$  to phrase  $\Lambda$  as FF-median instance  $\mathbf{R}(\Lambda) = (G, H, I, \sigma)$  such that the value  $\mathcal{F}_\lambda(M)$  of a median  $M$  of  $\mathbf{R}(\Lambda)$  is limited by  $\mathcal{F}_\lambda(M) \leq 2 \cdot l + 3$ . In doing so, we associate vertices of  $V$  with genes of extant genomes  $G, H$  and  $I$ . In order to keep track of associated genes, we denote by function  $\xi(x)$  the list of vertices associated with gene  $x$ . We further introduce two types of unassociated genes, “ $\emptyset$ ” and “ $*$ ”, whose members are identified by subscript notation.

Transformation  $\mathbf{R}$ :

1. Construct genome  $G$  such that for each vertex  $v \in V$  there exists two associated genes  $g_v, \bar{g}_v \in \mathcal{C}(G)$ , i.e.  $\xi(g_v) = \xi(\bar{g}_v) = v$ . Further, let each gene pair  $g_v, \bar{g}_v$  form a circular chromosome, giving rise to adjacency set  $\mathcal{A}(G) = \{\{\bar{g}_v^h, g_v^t\}, \{\bar{g}_v^t, g_v^h\} \mid v \in V, g_v, \bar{g}_v \in \mathcal{C}(G)\}$ .
2. For each edge  $(u, v) \in E$  construct a circular chromosome  $\mathcal{X}_{uv}$  hosting two genes  $x_{uv}, x_\emptyset \in \mathcal{C}(\mathcal{X}_{uv})$ , with gene  $x_{uv}$  being associated with both vertices  $u$  and  $v$  and gene  $x_\emptyset$  being unassociated. Further, let both genes form a circular chromosome, giving rise to adjacency set  $\mathcal{A}(\mathcal{X}_{uv}) = \{\{x_{uv}^h, x_\emptyset^t\}, \{x_\emptyset^h, x_{uv}^t\}\}$ .
3. Assign each chromosome constructed in the previous step either to genome  $H$  or to genome  $I$  such that each vertex  $v \in V$  is associated with at most two genes per genome.
4. Complete genomes  $H$  and  $I$  with additional circular chromosomes  $\mathcal{X}_v$  where  $\mathcal{C}(\mathcal{X}_v) = \{x_v, x_\emptyset\}$  and  $\mathcal{A}(\mathcal{X}_v) = \{\{x_v^h, x_\emptyset^t\}, \{x_\emptyset^h, x_v^t\}\}$  such that each vertex in  $V$  is associated with exactly two genes per genome.

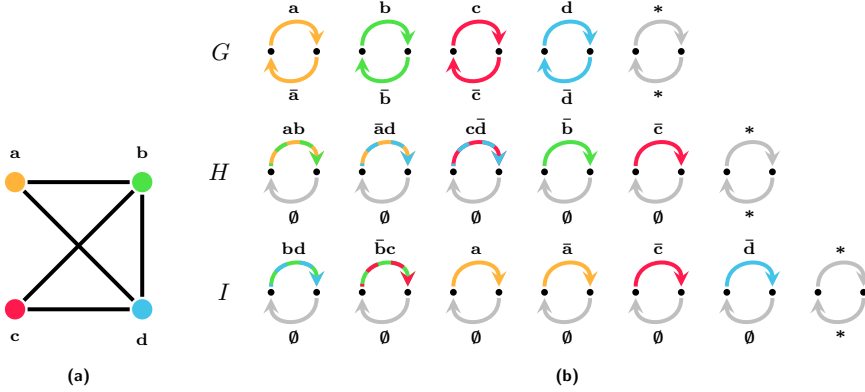

Figure 1: (a) A simple graph bounded by degree three and (b) a corresponding FF-Median instance constructed with transformation scheme **R**.

5. For each vertex  $v \in V$ , let  $g, \bar{g} \in \mathcal{C}(G)$ ,  $h, \bar{h} \in \mathcal{C}(H)$ , and  $i, \bar{i} \in \mathcal{C}(I)$  be the pairs of genes associated with  $v$ , i.e.  $\xi(g) = \xi(\bar{g}) = \xi(h) \cap \xi(i) = \xi(\bar{h}) \cap \xi(\bar{i}) = v$ . Assign gene similarities  $\sigma(g, h) = \sigma(g, i) = \sigma(h, i) = 1$  and  $\sigma(\bar{g}, \bar{h}) = \sigma(\bar{g}, \bar{i}) = \sigma(\bar{h}, \bar{i}) = 1$ .
6. Add a copy of circular chromosome  $\mathcal{X}_*$  to each genome  $G, H$ , and  $I$ , where  $\mathcal{C}(\mathcal{X}_*) = \{x_*, \bar{x}_*\}$  and  $\mathcal{A}(\mathcal{X}_*) = \{\{x_*^h, \bar{x}_*^t\}, \{\bar{x}_*^h, x_*^t\}\}$ . Let  $g_*, \bar{g}_* \in \mathcal{C}(G)$ ,  $h_*, \bar{h}_* \in \mathcal{C}(H)$ , and  $i_*, \bar{i}_* \in \mathcal{C}(I)$ , set the gene similarity score between all pairs of genes in  $\{g_*, h_*, i_*\}$  and  $\{\bar{g}_*, \bar{h}_*, \bar{i}_*\}$  respectively, to 1. Lastly, set the gene similarity score of all pairs of unassociated genes of type “ $\emptyset$ ” including genes  $g_*, \bar{g}_*$  to  $\frac{1}{4}$ .

Except for step 3, none of the instructions of transformation scheme **R** are computationally challenging. Note that in step 3 the demanded partitioning of chromosomes into genomes  $H$  and  $I$  is always possible as consequence of Vizing’s Theorem [4], by which every graph with maximum node degree  $d$  is edge-colorable using at most  $d$  or  $d + 1$  colors. Hence, using colors  $\chi_1, \chi_2, \chi_3, \chi_4$  with  $\chi_1 = \chi_2 \equiv I$ ,  $\chi_3 = \chi_4 \equiv H$  and Misra and Gries’ algorithm [2], edges of graph  $\Lambda = (E, V)$  can be partitioned into two groups in  $\mathcal{O}(|E||V|)$  time implying an assignment to genomes  $H$  and  $I$ .

**Example 1.** Figure 1 (b) shows a FF-Median instance constructed with transformation scheme **R** from the simple graph depicted in Figure 1 (a). Gene similarities between genes are not shown, but can be derived from the genes’ labeling.

We structure our proof that the presented transformation is in fact a valid mapping of an MAX IS-3 instance to an instance of FF-Median into three different lemmas:

**Lemma 1.** Given a median  $M$  of FF-Median instance  $\mathbf{R}(\Lambda) = (G, H, I, \sigma)$ , (1) for each median gene  $(g, h, i) \in \mathcal{C}(M)$  where  $g, h$ , or  $i$  are associated with vertices in  $V(\Lambda)$  holds  $\xi(g) = \xi(h) \cap \xi(i) = v$ ,  $v \in V(\Lambda)$ ; (2) there exist at most two median genes whose corresponding extant genes are not associated to any vertex in  $V(\Lambda)$ .

*Proof.* Assume for contradiction that claim (1) does not hold. Then either  $\xi(g) \neq \xi(h) \cap \xi(i)$ , or  $\xi(h) \cap \xi(i) = \emptyset$ , both of which violate the constraint of establishing gene similarities between associated genes that is given in step 5. For claim (2), observe that the only unassociated genes in genome  $G$  are gene  $g_*$  and  $\bar{g}_*$  introduced in step 6, limiting the overall number of unassociated genes in any median  $M$ .  $\square$

**Lemma 2.** *The conserved adjacency set of any median  $M$  of FF-Median instance  $\mathbf{R}(\Lambda) = (G, H, I, \sigma)$  is of the form  $\mathcal{A}(M) \cap \mathcal{A}_\lambda^C = \mathcal{A}_\lambda^G(M) \cup \{\{m_*^h, \bar{m}_*^t\}, \{\bar{m}_*^h, m_*^t\}\}$ , where the extant genes corresponding to  $m_*$  and  $\bar{m}_*$  are all unassociated genes of type “\*” and  $\mathcal{A}(M)_\lambda^G \subseteq \{\{m_1^h, m_2^t\} \in \mathcal{A}_\lambda^C \mid \xi(\pi_G(m_1)) = \xi(\pi_G(m_2))\}$ .*

*Proof.* Observe that both candidate median adjacencies  $a_* = \{m_*^h, \bar{m}_*^t\}$  and  $\bar{a}_* = \{\bar{m}_*^h, m_*^t\}$  are conserved in all three genomes, whereas all other conserved candidate adjacencies between associated and unassociated genes can be at most conserved in  $H$  and  $I$ . Establishing adjacencies  $a_*, \bar{a}_*$  gives rise to a cumulative adjacency score of 6. Conversely, up to 4 non-conflicting adjacencies between associated and unassociated genes can be established that are conserved in both genomes  $H$  and  $I$ . However, since such adjacencies are only conserved between unassociated genes of type “ $\emptyset$ ” whose gene similarities are set to  $\frac{1}{4}$ , the best cumulative adjacency score can not exceed 4. Thus, adjacencies  $a_*, \bar{a}_*$  must be contained in any median. Further, because of this and the fact that in both genomes  $H$  and  $I$ , each gene associated with vertices of  $V(\Lambda)$  is only adjacent to an unassociated gene,  $M$  cannot contain adjacencies that are conserved in extant genomes other than genome  $G$ , which are the adjacencies of each gene pair  $(g_v, \bar{g}_v)$  associated with the same vertex  $v \in V(\Lambda)$ .  $\square$

**Lemma 3.** *Given FF-median instance  $\mathbf{R}(\Lambda) = (G, H, I, \sigma)$ , let  $m_u, m_v$  be any pair of candidate median adjacencies of  $\mathcal{A}_\lambda$  whose corresponding extant genes are associated to vertices  $u, v \in V(\Lambda)$ , then  $m_u, m_v$  are conflicting if and only if  $(u, v) \in E$ .*

*Proof.* By construction in step 5 of transformation scheme  $\mathbf{R}$ , each vertex  $v \in V$  is associated with exactly two candidate median genes  $m_v = (g, h, i), \bar{m}_v = (\bar{g}, \bar{h}, \bar{i}), m_v, \bar{m}_v \in \Sigma_\lambda$ , such that  $\xi(g) = \xi(h) \cap \xi(i) = v$  and  $\xi(\bar{g}) = \xi(\bar{h}) \cap \xi(\bar{i}) = v$ . Further, let  $u$  be another vertex of  $V(\Lambda)$ , such that  $(u, v) \in E(\Lambda)$ , and  $m_u, \bar{m}_u$  are its two corresponding candidate median genes. Then, by construction in step 2, there exists exactly one extant gene  $x$  with  $\xi(x) = uv$  (which, by assignment in step 3, is either contained in genome  $H$  or  $I$ ). Consequently, either  $m_u$  is in conflict with  $m_v$ , or  $\bar{m}_u$  with  $\bar{m}_v$ , or  $\bar{m}_u$  with  $m_v$ , or  $m_u$  with  $\bar{m}_v$ . Recall that by construction in step 2 in  $\mathbf{R}$  and by Lemma 2,  $m_u, \bar{m}_u$  and  $m_v, \bar{m}_v$  form conserved candidate adjacencies  $\{m_u^h, \bar{m}_u^t\}, \{\bar{m}_u^h, m_u^t\}$  and  $\{m_v^h, \bar{m}_v^t\}, \{\bar{m}_v^h, m_v^t\}$ , respectively. Clearly, independent of which of the candidate median gene pairs of  $u$  and  $v$  are in conflict, both pairs of candidate median adjacencies are in conflict with each other.

Now, let  $u, v$  be two vertices of  $V(\Lambda)$  such that edge  $(u, v) \notin E(\Lambda)$ , then there exists no gene  $x$  in extant genomes  $H$  and  $I$  with  $\xi(x) = uv$ . Even more, due to Lemma 1, there cannot exist a candidate median gene  $(g, h, i)$  with  $\{u, v\} \subseteq \xi(g) \cup \xi(h) \cup \xi(i)$ . Thus, the candidate median genes of  $u$  and  $v$  are not conflicting and neither are their corresponding candidate median adjacencies.  $\square$

We proceed to show that the given transformation scheme gives rise to an approximation preserving reduction known as *L-reduction*. An L-reduction reduces a problem  $P$  to a problem  $Q$  by means of two polynomial-time computable transformation functions: A function  $f : P \rightarrow Q' \subseteq Q$  that maps each instance of  $P$  onto an instance of  $Q$ , herein represented by transformation scheme  $\mathbf{R}$ , and a function  $g : Q' \rightarrow P$  to transform any feasible solution of an instance in  $Q'$  to a feasible solution of an instance of  $P$ . Here, a *feasible* solution means any – not necessarily *optimal* – solution that obeys the problem’s constraints. A feasible solution of FF-Median instance  $(G, H, I, \sigma)$  is an *ancestral genome*  $X$  where  $\mathcal{C}(X) \subseteq \Sigma_\lambda$  and  $\mathcal{A}(X) \subseteq \mathcal{A}_\lambda$  such that  $\mathcal{A}(X)$  is conflict-free. We give the following transformation scheme to map ancestral genomes of an FF-Median instance to solutions of an MAX IS-3 instance:

**Transformation  $\mathbf{S}$ :** Given any ancestral genome  $X$  of  $\mathbf{R}(\Lambda)$ , return  $\{\xi(\pi_G(m_1)) \mid \{m_1^a, m_2^b\} \in \mathcal{A}(X) : \mathbb{I}_G(\pi_G(m_1)^a, \pi_G(m_2)^b) = 1 \text{ and } \xi(\pi_G(m_1)) \neq \emptyset\}$ .

We define score function  $s_\lambda(X) \equiv \frac{1}{2}\mathcal{F}_\lambda(X) - 3$  of an ancestral genome  $X$ . For  $(\mathbf{R}, \mathbf{S})$  to be an L-reduction the following two properties must hold for any given MAX IS-3 instance  $(\Lambda, l)$ : (1) There is some constant  $\alpha$  such that for any median  $M$  of the transformed FF-Median instance  $\mathbf{R}(\Lambda)$  holds  $s_\lambda(M) \leq \alpha \cdot l$ ; (2) There is some constant  $\beta$  such that for any ancestral genome  $X$  of  $\mathbf{R}(\Lambda)$  holds  $l - |\mathbf{S}(X)| \leq \beta \cdot |s_\lambda(M) - s_\lambda(X)|$ . We proceed to proof the following lemma:

**Lemma 4.**  $(\mathbf{R}, \mathbf{S})$  is an L-reduction of problem MAX IS-3 to problem FF-Median with  $\alpha = \beta = 1$ .

*Proof.* For any median  $M$  of FF-Median instance  $\mathbf{R}(\Lambda)$ , the number of conserved median adjacencies with correspondence to the same vertex of  $\Lambda$  is two, giving rise a cumulative adjacency score of two. From Lemmata 2 and 3 immediately follows that any ancestral genome of  $\mathbf{R}(\Lambda)$  that maximizes the number of conserved adjacencies also maximizes the number of independent vertices in  $\Lambda$ . Recall that the two conserved adjacencies between unassociated genes of type “\*” (which are part of all medians) give rise to a cumulative adjacency score of 6, we conclude that  $|\mathcal{A}(M) \cap \mathcal{A}_\lambda^C| - 2 = \frac{1}{2}\mathcal{F}_\lambda(M) - 3 = s_\lambda(M) = l$ , thus  $\alpha = 1$ .

Because  $l = s_\lambda(M)$ , it remains to show that  $l - |\mathbf{S}(X)| \leq \beta |l - s_\lambda(X)|$ . In a *sub-optimal* ancestral genome of  $\mathbf{R}(\Lambda)$ , median genes with no association to vertices of  $\Lambda$  can also contain extant genes of type “ $\emptyset$ ”. These unassociated median genes can form “mixed” conserved adjacencies with genes that are associated with vertices of  $\Lambda$ . Such mixed conserved adjacencies have no correspondence to vertices in  $\Lambda$  and do not contribute to the transformed solution  $\mathbf{S}(X)$  of an ancestral genome  $X$ . Yet, as mentioned earlier, the cumulative adjacency score of all mixed conserved adjacencies can not exceed 4. Therefore it holds that  $|\mathbf{S}(X)| \geq s_\lambda(X)$  and we conclude  $\beta = 1$ .  $\square$

## 2 Simulated sequence evolution with ALF

| PAM | Genome   | Inversions | Transpositions | Duplications | Losses |
|-----|----------|------------|----------------|--------------|--------|
| 10  | <i>G</i> | 8.7        | 6.1            | 7.3          | 6.9    |
|     | <i>H</i> | 7.3        | 4.5            | 6.3          | 5.4    |
|     | <i>I</i> | 8.5        | 6.6            | 10.4         | 5.6    |
| 30  | <i>G</i> | 24.5       | 16.9           | 21.0         | 22.7   |
|     | <i>H</i> | 23.4       | 19.8           | 20.6         | 18.4   |
|     | <i>I</i> | 25.5       | 17.2           | 17.5         | 20.9   |
| 50  | <i>G</i> | 39.9       | 27.8           | 32.4         | 36.7   |
|     | <i>H</i> | 41.8       | 31.8           | 31.0         | 31.7   |
|     | <i>I</i> | 43.2       | 30.0           | 28.7         | 39.7   |
| 70  | <i>G</i> | 58.6       | 42.3           | 41.1         | 39.2   |
|     | <i>H</i> | 57.0       | 43.6           | 46.3         | 45.1   |
|     | <i>I</i> | 60.4       | 41.4           | 40.7         | 39.1   |
| 90  | <i>G</i> | 75.0       | 54.5           | 53.1         | 64.2   |
|     | <i>H</i> | 69.9       | 50.5           | 54.1         | 65.0   |
|     | <i>I</i> | 75.2       | 55.5           | 60.3         | 58.5   |
| 110 | <i>G</i> | 96.3       | 69.4           | 67.0         | 74.6   |
|     | <i>H</i> | 90.6       | 64.2           | 62.5         | 70.9   |
|     | <i>I</i> | 90.2       | 68.5           | 62.6         | 61.2   |
| 130 | <i>G</i> | 105.7      | 76.3           | 74.4         | 81.0   |
|     | <i>H</i> | 108.7      | 78.2           | 79.6         | 82.8   |
|     | <i>I</i> | 110.8      | 73.6           | 73.9         | 77.3   |

Table 1: Average benchmark data of seven evolutionary distances, each comprising ten genomic datasets generated by ALF [1].

| Parameter name               | Value                                                                                                                                                                                                                                                                                                                                                                                                                                                                                                                                                               |
|------------------------------|---------------------------------------------------------------------------------------------------------------------------------------------------------------------------------------------------------------------------------------------------------------------------------------------------------------------------------------------------------------------------------------------------------------------------------------------------------------------------------------------------------------------------------------------------------------------|
| <i>sequence evolution</i>    |                                                                                                                                                                                                                                                                                                                                                                                                                                                                                                                                                                     |
| substitution model           | WAG (amino acid substitution model)                                                                                                                                                                                                                                                                                                                                                                                                                                                                                                                                 |
| insertion and deletion       | Zipfian distribution<br>exponent $c = 1.8214$<br>insertion rate<br>0.0003<br>maximum insertion length<br>50                                                                                                                                                                                                                                                                                                                                                                                                                                                         |
| rate variation among sites   | $\Gamma$ -distribution<br>shape parameter $a = 1$<br>number of classes<br>5<br>rate of invariable sites<br>0.01                                                                                                                                                                                                                                                                                                                                                                                                                                                     |
| <i>genome rearrangement</i>  |                                                                                                                                                                                                                                                                                                                                                                                                                                                                                                                                                                     |
| inversion                    | rate<br>0.0004<br>maximum inversion length<br>100                                                                                                                                                                                                                                                                                                                                                                                                                                                                                                                   |
| transposition                | rate<br>0.0002<br>maximum transposition length<br>100<br>rate of inverted transposition<br>0.1                                                                                                                                                                                                                                                                                                                                                                                                                                                                      |
| <i>gene family evolution</i> |                                                                                                                                                                                                                                                                                                                                                                                                                                                                                                                                                                     |
| gene duplication             | rate<br>0.0001<br>max. no. of genes involved in one dupl.<br>5<br>probability of transposition after dupl.<br>0.5<br>fission/fusion after duplication<br>0.1<br>probability of rate change<br>0.2<br>rate change factor<br>0.9<br>probability of temporary rate change (duplicate)<br>0.5<br>temporary rate change factor (duplicate)<br>1.5<br>life of rate change (duplicate)<br>10 PAM<br>probability of temporary rate change (orig+duplicate)<br>0.3<br>temporary rate change factor (orig+duplicate)<br>1.2<br>life of rate change (orig+duplicate)<br>10 PAM |
| gene loss                    | rate<br>0.0001<br>maximum length of gene loss<br>5                                                                                                                                                                                                                                                                                                                                                                                                                                                                                                                  |
| gene fission/fusion          | rate<br>0.0<br>maximum number of fused genes<br>-                                                                                                                                                                                                                                                                                                                                                                                                                                                                                                                   |

Table 2: Parameter settings for simulations generated by ALF [1].

### 3 Real genomes dataset

| Genbank ID | Name                                                                                 |
|------------|--------------------------------------------------------------------------------------|
| U00096.3   | Escherichia coli str. K-12 substr. MG1655, complete genome                           |
| AE004439.1 | Pasteurella multocida subsp. multocida str. Pm70, complete genome                    |
| AE016853.1 | Pseudomonas syringae pv. tomato str. DC3000, complete genome                         |
| AM039952.1 | Xanthomonas campestris pv. vesicatoria complete genome                               |
| CP000266.1 | Shigella flexneri 5 str. 8401, complete genome                                       |
| CP000305.1 | Yersinia pestis Nepal516, complete genome                                            |
| CP000569.1 | Actinobacillus pleuropneumoniae L20 serotype 5b complete genome                      |
| CP000744.1 | Pseudomonas aeruginosa PA7, complete genome                                          |
| CP000766.3 | Rickettsia rickettsii str. Iowa, complete genome                                     |
| CP000950.1 | Yersinia pseudotuberculosis YPIII, complete genome                                   |
| CP001120.1 | Salmonella enterica subsp. enterica serovar Heidelberg str. SL476, complete genome   |
| CP001172.1 | Acinetobacter baumannii AB307-0294, complete genome                                  |
| CP001363.1 | Salmonella enterica subsp. enterica serovar Typhimurium str. 14028S, complete genome |
| FM180568.1 | Escherichia coli 0127:H6 E2348/69 complete genome, strain E2348/69                   |
| CP002086.1 | Nitrosococcus watsoni C-113, complete genome                                         |

Table 3: Dataset of genomes used in comparison with the OMA database.

## References

- [1] D A Dalquen, M Anisimova, G H Gonnet, and C Dessimoz. Alf – a simulation framework for genome evolution. *Mol. Biol. Evol.*, 29(4):1115–1123, 2012.
- [2] J Misra and D Gries. A constructive proof of Vizing’s theorem. *Inform. Process. Lett.*, 41(3):131–133, 1992.
- [3] C H Papadimitriou and M Yannakakis. Optimization, approximation, and complexity classes. *J. Comp. Sys. Sci.*, 43(3):425–440, 1991.
- [4] V G Vizing. On an estimate of the chromatic class of a  $p$ -graph. *Diskret. Analiz No.*, 3:25–30, 1964.
